# Supplementary material
Source: PubMed Central journal article supplement (PMC5104665)
Supplement: NIHMS763236-supplement-2.pdf [file NIHMS763236-supplement-2.pdf]

## Supplemental Material

### Table of Contents

1. Screenshots of all oncology drug approvals by the U.S. Food and Drug Administration in 2009-2014 from their website (see methods for link)
2. Search terms for literature search for surrogate-survival association studies
3. Search terms for subsequent publication assessing overall survival
4. Consort diagrams
5. Flow diagram of overall study strategy

## Hematology/Oncology (cancer) Approvals & Safety Notifications: Previous News Items

### 2009

- FDA granted approval to romidepsin for injection (ISTODAX, Gloucester Pharmaceuticals Inc.) for the treatment of cutaneous T-cell lymphoma (CTCL) in patients who have received at least one prior systemic therapy. [More Information](#) (November 6, 2009)
- FDA granted accelerated approval to ofatumumab (Arzerra, GlaxoSmithKline) for the treatment of patients with chronic lymphocytic leukemia (CLL) refractory to fludarabine and alemtuzumab. [More Information](#) (October 26, 2009)
- FDA granted approval to pazopanib tablets (VOTRIENTTM, GlaxoSmithKline) for the treatment of patients with advanced renal cell carcinoma. [More Information](#) (October 19, 2009)
- FDA granted accelerated approval to pralatrexate injection (FOLOTYN, Allos Therapeutics, Inc.) for the treatment of patients with relapsed or refractory peripheral T-cell lymphoma (PTCL). [More Information](#) (September 24, 2009)
- FDA granted approval for the use of bevacizumab (Avastin, Genentech, Inc.) in combination with interferon alfa for the treatment of patients with metastatic renal cell carcinoma. [More Information](#) (July 31, 2009)
- FDA implemented Class Labeling Changes to anti-EGFR monoclonal antibodies, cetuximab (Erbix) and panitumumab (Vectibix): *KRAS* Mutations changes were made to the product labels of cetuximab (Erbix ImClone Systems, Branchburg, NJ) and panitumumab (Vectibix Amgen, Thousand Oaks, CA). [More Information](#) (July 17, 2009)
- FDA approved pemetrexed (Alimta) for maintenance treatment of locally advanced or metastatic nonsquamous non-small cell lung cancer patients with no disease progression after four cycles of platinum-based first-line chemotherapy. [More Information](#) (July 2, 2009)
- FDA approves ferumoxytol (Feraheme Injection, AMAG Pharmaceuticals, Inc.) for the treatment of iron deficiency anemia in adult patients with chronic kidney disease (CKD). Ferumoxytol is an iron-containing product for intravenous (IV) administration. [More Information](#) (June 30, 2009)
- FDA granted accelerated approval to bevacizumab injection (Avastin, Genentech, Inc.) as a single agent for patients with glioblastoma, with progressive disease following prior therapy. [More Information](#) (May 5, 2009)
- FDA approves everolimus tablets (AFINITOR, Novartis) for treatment of patients with advanced renal cell carcinoma after failure of treatment with sunitinib or sorafenib [More Information](#) (March 31, 2009)









- extracellular dimerization domain (Subdomain II) of HER2, and thereby blocks ligand-dependent heterodimerization of HER2 with other HER family members, including EGFR, HER3 and HER4. [More Information](#). June 8, 2012
- FDA approved pazopanib tablets (VOTRIENT, a registered Trademark of GlaxoSmithKline) for the treatment of patients with advanced soft tissue sarcoma (STS) who have received prior chemotherapy. The efficacy of pazopanib for the treatment of patients with adipocytic STS or gastrointestinal stromal tumors (GIST) has not been demonstrated. [More Information](#). April 26, 2012
  - FDA granted accelerated approval to everolimus (Afinitor tablets, Novartis) for the treatment of adults with renal angiomyolipoma, associated with tuberous sclerosis complex (TSC), who do not require immediate surgery. [More Information](#). April 26, 2012
  - FDA announced major actions taken to bolster the supply of Doxil (Janssen Research and Development LLC) and preservative-free formulations of methotrexate. In response to the critical shortage of Doxil (doxorubicin hydrochloride liposome injection) effective immediately FDA is exercising its enforcement discretion for the temporary importation and distribution of Sun Pharma Global's Lipodox. [More Information](#) February 21, 2012
  - FDA granted regular approval for imatinib mesylate tablets (Gleevec, Novartis Pharmaceuticals) for the adjuvant treatment of adult patients following complete gross resection of Kit (CD117) positive Gastrointestinal Stromal Tumors (GIST). Accelerated approval for this indication was granted in December 2008. Labeling is also revised to include the results of a randomized trial demonstrating that recurrence-free survival (RFS) and overall survival (OS) were improved by continuing adjuvant imatinib therapy to 36 months. [More Information](#)(January 31, 2012)
  - FDA approved vismodegib (ERIVEDGE Capsule, Genentech, Inc.) for the treatment of adults with metastatic basal cell carcinoma or with locally advanced basal cell carcinoma that has recurred following surgery or who are not candidates for surgery, and who are not candidates for radiation. [More Information](#) (January 30, 2012)
  - FDA approved axitinib tablets (Inlyta, Pfizer, Inc.) for the treatment of advanced renal cell carcinoma after failure of one prior systemic therapy. [More Information](#) (January 27, 2012)
  - FDA approved glucarpidase injection (Voraxaze, BTG International Inc.) for the treatment of toxic plasma methotrexate concentrations (> 1 µmol/L) in patients with delayed methotrexate clearance due to impaired renal function. [More Information](#) (January 17, 2012)



## Hematology/Oncology (Cancer) Approvals & Safety Notifications

[Sign up for free updates from FDA](#)

### 2015

- FDA approved approved ramucirumab (CYRAMZA, Eli Lilly and Company) for use in combination with FOLFIRI for the treatment of patients with metastatic colorectal cancer (mCRC) whose disease has progressed on a first line bevacizumab-, oxaliplatin- and fluoropyrimidine-containing regimen. Ramucirumab is a recombinant human monoclonal IgG1 antibody that binds to the human vascular endothelial growth factor- receptor 2 (VEGF-R2), preventing the interaction of VEGF-R2 to its ligands. [More Information](#). April 24, 2015
- FDA approved dinutuximab (Unituxin, United Therapeutics Corporation), in combination with granulocyte-macrophage colony-stimulating factor (GM-CSF), interleukin-2 (IL-2), and 13-cis-retinoic acid (RA), for the treatment of pediatric patients with high-risk neuroblastoma who achieve at least a partial response to prior first-line multiagent, multimodality therapy. [More Information](#). March 10, 2015
- FDA approved filgrastim-sndz (ZARXIO Injection, Sandoz Inc.), as a biosimilar to US-licensed Neupogen for the five indications for which US-licensed Neupogen is approved. The formulation of ZARXIO differs from that of US-licensed Neupogen in one inactive component. [More Information](#). March 6, 2015
- FDA granted approval to nivolumab (OPDIVO, Bristol-Myers Squibb Company) for the treatment of patients with metastatic squamous non-small cell lung cancer (NSCLC) with progression on or after platinum-based chemotherapy. [More Information](#). March 4, 2015
- FDA granted accelerated approval to panobinostat (FARYDAK capsules, Novartis Pharmaceuticals) in combination with bortezomib and dexamethasone for the treatment of patients with multiple myeloma who have received at least two prior regimens, including bortezomib and an immunomodulatory agent. As a condition of this accelerated approval, FDA requires the sponsor to conduct a trial to verify and describe the clinical benefit of panobinostat for patients with multiple myeloma. [More Information](#). February 23, 2015
- FDA approved lenvatinib (Lenvima) for the treatment of patients with locally recurrent or metastatic, progressive, radioactive iodine-refractory differentiated thyroid cancer. [More Information](#). February 13, 2015
- FDA granted accelerated approval to palbociclib (IBRANCE, Pfizer, Inc.) for use in combination

- with letrozole for the treatment of postmenopausal women with estrogen receptor (ER)-positive, human epidermal growth factor receptor 2 (HER2)-negative advanced breast cancer as initial endocrine-based therapy for their metastatic disease. [More Information](#). February 3, 2015
- FDA approved ibrutinib (Imbruvica Capsules, Pharmacyclics, Inc.) for the treatment of patients with Waldenstrom's macroglobulinemia (WM). Ibrutinib was initially approved in November 2013 for the treatment of patients with mantle cell lymphoma (MCL) who have received at least one prior therapy. Ibrutinib also received approval in February 2014 for the treatment of chronic lymphocytic leukemia (CLL) in patients who received at least one prior therapy and in July 2014 for the treatment of CLL with 17p deletion. [More Information](#). January 29, 2015

## 2014

- FDA granted accelerated approval to nivolumab (OPDIVO, Bristol-Myers Squibb Company) for the treatment of patients with unresectable or metastatic melanoma and disease progression following ipilimumab and, if BRAF V600 mutation positive, a BRAF inhibitor. [More Information](#). December 22, 2014
- FDA approved olaparib capsules (Lynparza, AstraZeneca Pharmaceuticals LP) as monotherapy for the treatment of patients with deleterious or suspected deleterious germline BRCA mutated (gBRCAm) (as detected by an FDA-approved test) advanced ovarian cancer who have been treated with three or more prior lines of chemotherapy. [More Information](#). December 19, 2014
- FDA approved lanreotide (Somatuline Depot Injection, Ipsen Pharma) for the treatment of patients with unresectable, well or moderately differentiated, locally advanced or metastatic gastroenteropancreatic neuroendocrine tumors (GEP-NETs) to improve progression-free survival. [More Information](#). December 16, 2014
- FDA approved ramucirumab (Cyramza Injection, Eli Lilly and Company) for use in combination with docetaxel for the treatment of patients with metastatic non-small cell lung cancer (NSCLC) with disease progression on or after platinum-based chemotherapy. [More Information](#). December 12, 2014
- FDA approved ruxolitinib (Jakafi, Incyte Corporation) for the treatment of patients with polycythemia vera (PV) who have had an inadequate response to or are intolerant of hydroxyurea (HU). [More Information](#). December 4, 2014
- FDA granted accelerated approval for blinatumomab (BLINCYTO, Amgen Inc.) for the treatment of Philadelphia chromosome-negative relapsed or refractory B-cell precursor acute lymphoblastic leukemia (R/R ALL). [More Information](#). December 3, 2014
- FDA approved bevacizumab solution for intravenous infusion (Avastin, Genentech, Inc.) in combination with paclitaxel, pegylated liposomal doxorubicin, or topotecan for the treatment of patients with platinum-resistant, recurrent epithelial ovarian, fallopian tube, or primary peritoneal cancer. [More Information](#). November 14, 2014



- FDA approved ramucirumab (Cyramza, Eli Lilly and Company) for use in combination with paclitaxel for the treatment of patients with advanced gastric or gastroesophageal junction (GEJ) adenocarcinoma. Ramucirumab was approved in April, 2014 as a single agent for the treatment of patients with advanced gastric or GEJ adenocarcinoma refractory to or progressive following first-line therapy with platinum or fluoropyrimidine chemotherapy. [More Information](#). November 5, 2014
- FDA granted accelerated approval to pembrolizumab (KEYTRUDA, Merck Sharp & Dohme Corp.) for the treatment of patients with unresectable or metastatic melanoma and disease progression following ipilimumab and, if BRAF V600 mutation positive, a BRAF inhibitor. [More Information](#). September 4, 2014
- FDA approved bevacizumab solution for intravenous infusion (Avastin, Genentech, Inc.) for the treatment of persistent, recurrent or metastatic cervical cancer, in combination with paclitaxel and cisplatin or paclitaxel and topotecan. [More Information](#). August 14, 2014
- FDA approved idelalisib (Zydelig tablets, GileadSciences, Inc.) for the treatment of patients with relapsed chronic lymphocytic leukemia (CLL), in combination with rituximab, for whom rituximab alone would be considered appropriate therapy due to other co-morbidities. [More Information](#). July 23, 2014
- FDA granted accelerated approval to belinostat (BELEODAQ, Spectrum Pharmaceuticals, Inc.) for the treatment of patients with relapsed or refractory peripheral T-cell lymphoma (PTCL). [More Information](#). July 3, 2014
- FDA granted accelerated approval to ceritinib (ZYGADIA, Novartis Pharmaceuticals Corporation) for the treatment of patients with anaplastic lymphoma kinase (ALK)-positive, metastatic non-small cell lung cancer (NSCLC) with disease progression on or who are intolerant to crizotinib. [More Information](#). April 29, 2014
- FDA approved an oral suspension of mercaptopurine (Purixan, NOVA Laboratories Limited). Mercaptopurine is a 20 mg/ml oral suspension. Purixan is indicated for the treatment of patients with acute lymphoblastic leukemia (ALL) as part of a combination regimen. [More Information](#). April 28, 2014
- FDA approved siltuximab (Sylvant Injection Janssen Biotech, Inc.), for the treatment of patients with multicentric Castleman's disease (MCD) who are human immunodeficiency virus (HIV) - negative and human herpes virus -8 (HHV-8) -negative. [More Information](#). April 23, 2014.
- FDA approved ramucirumab (Cyramza, Eli Lilly and Company) for use as a single agent for the treatment of patients with advanced or metastatic, gastric or gastroesophageal junction (GEJ) adenocarcinoma with disease progression on or after prior treatment with fluoropyrimidine- or platinum-containing chemotherapy. Ramucirumab is a recombinant monoclonal antibody of the IgG1 class that binds to vascular endothelial growth factor receptor-2 (VEGFR-2) and blocks the activation of the receptor. [More Information](#). April 21, 2014
- FDA approved ofatumumab (Arzerra Injection, for intravenous infusion; GlaxoSmithKline) in

- combination with chlorambucil, for the treatment of previously untreated patients with chronic lymphocytic leukemia (CLL), for whom fludarabine-based therapy is considered inappropriate. [More Information](#). April 17, 2014
- FDA granted accelerated approval to ibrutinib (IMBRUVICA, Pharmacyclics, Inc.) for the treatment of patients with chronic lymphocytic leukemia (CLL) who have received at least one prior therapy. Ibrutinib previously received accelerated approval on November 13, 2013 for the treatment of patients with mantle cell lymphoma who have received at least one prior therapy. [More Information](#). February 12, 2014
  - FDA granted accelerated approval to trametinib (Mekinist tablets, GlaxoSmithKline, LLC) and dabrafenib (Tafinlar capsules, GlaxoSmithKline, LLC) for use in combination in the treatment of patients with unresectable or metastatic melanoma with a BRAF V600E or V600K mutation as detected by an FDA-approved test. [More Information](#). January 10, 2014

### 2013

- FDA approved sorafenib (NEXAVAR tablets, Bayer Healthcare Pharmaceuticals Inc.) for the treatment of locally recurrent or metastatic, progressive, differentiated thyroid carcinoma (DTC) refractory to radioactive iodine treatment. Sorafenib was previously approved for treatment of renal cell carcinoma (2005) and hepatocellular carcinoma (2007) [More Information](#). November 22, 2013
- FDA granted regular approval for crizotinib (Xalkori, Pfizer, Inc.) capsules for the treatment of patients with metastatic non-small cell lung cancer (NSCLC) whose tumors are anaplastic lymphoma kinase (ALK)-positive as detected by an FDA-approved test. [More Information](#). November 20, 2013
- FDA granted accelerated approval to Ibrutinib (IMBRUVICA, Pharmacyclics, Inc.) for the treatment of patients with mantle cell lymphoma (MCL) who have received at least one prior therapy. [More Information](#). November 13, 2013
- FDA approved obinutuzumab (GAZYVA injection, for intravenous use, Genentech, Inc.; previously known as GA101) for use in combination with chlorambucil for the treatment of patients with previously untreated chronic lymphocytic leukemia (CLL). [More Information](#). November 1, 2013
- FDA has asked the manufacturer of the leukemia chemotherapy drug Iclusig (ponatinib) to suspend marketing and sales of Iclusig because of the risk of life-threatening blood clots and severe narrowing of blood vessels. [More Information](#). October 31, 2013
- FDA provided information on the availability of doxorubicin hydrochloride liposome injection to supply the U.S. market. [More Information](#). October 8, 2013
- FDA granted accelerated approval to pertuzumab injection (PERJETA, Genentech, Inc.) for use in combination with trastuzumab and docetaxel for the neoadjuvant treatment of patients with HER2-positive, locally advanced, inflammatory, or early stage breast cancer (either greater than 2 cm in diameter or node positive) as part of a complete treatment regimen for early breast cancer. [More Information](#). September 30, 2013

- FDA approved paclitaxel protein-bound particles (albumin-bound) (Abraxane for injectable suspension, Abraxis BioScience, LLC, a wholly owned subsidiary of Celgene Corporation), in combination with gemcitabine for the first-line treatment of patients with metastatic adenocarcinoma of the pancreas. [More Information](#). September 6, 2013
- FDA approved afatinib (Gilotrif tablets, Boehringer Ingelheim Pharmaceuticals, Inc.), for the first-line treatment of patients with metastatic non-small cell lung cancer (NSCLC) whose tumors have epidermal growth factor receptor (EGFR) exon 19 deletions or exon 21 (L858R) substitution mutations as detected by an FDA-approved test. The safety and efficacy of afatinib have not been established in patients whose tumors have other EGFR mutations. Concurrent with this action, FDA approved the theascreen EGFR RGQ PCR Kit (QIAGEN) for detection of EGFR exon 19 deletions or exon 21 (L858R) substitution mutations.[More Information](#). July 12, 2013
- FDA approved denosumab (Xgeva injection, for subcutaneous use, Amgen Inc.) for the treatment of adults and skeletally mature adolescents with giant cell tumor of bone that is unresectable or where surgical resection is likely to result in severe morbidity. [More Information](#). June 13, 2013
- FDA approved lenalidomide capsules (REVLIMID, Celgene Corporation), for the treatment of patients with mantle cell lymphoma (MCL) whose disease has relapsed or progressed after two prior therapies, one of which included bortezomib. [More Information](#). June 5, 2013
- FDA approved trametinib (MEKINIST tablet, GlaxoSmithKline, LLC), for the treatment of patients with unresectable or metastatic melanoma with BRAF V600E or V600K mutation as detected by an FDA-approved test. [More Information](#). May 29, 2013
- FDA approved dabrafenib (TAFINLAR capsule, GlaxoSmithKline, LLC), for the treatment of patients with unresectable or metastatic melanoma with BRAF V600E mutation as detected by an FDA-approved test. [More Information](#). May 29, 2013
- FDA approved radium Ra 223 dichloride (Xofigo Injection, Bayer HealthCare Pharmaceuticals Inc.) for the treatment of patients with castration-resistant prostate cancer, symptomatic bone metastases and no known visceral metastatic disease. Xofigo is an alpha-particle emitting radiotherapeutic drug which mimics calcium and forms complexes with hydroxyapatite at areas of increased bone turnover, such as bone metastases. [More Information](#). May 15, 2013
- FDA approved erlotinib (Tarceva, Astellas Pharma Inc.) for the first-line treatment of metastatic non-small cell lung cancer (NSCLC) patients whose tumors have epidermal growth factor receptor (EGFR) exon 19 deletions or exon 21 (L858R) substitution mutations. This indication for erlotinib is being approved concurrently with the cobas EGFR Mutation Test, a companion diagnostic test for patient selection. [More Information](#). May 14, 2013
- FDA approved ado-trastuzumab emtansine (KADCYLA for injection, Genentech, Inc.), for use as a single agent for the treatment of patients with HER2-positive, metastatic breast cancer who previously received trastuzumab and a taxane, separately or in combination. Patients should have either received prior therapy for metastatic disease or developed disease recurrence during or within six months of completing adjuvant therapy. [More Information](#). February 22, 2013



- FDA granted accelerated approval to pomalidomide (POMALYST capsules, Celgene Corporation) for the treatment of patients with multiple myeloma who have received at least two prior therapies, including lenalidomide and bortezomib, and have demonstrated disease progression on or within 60 days of completion of the last therapy. [More Information](#). February 8, 2013
- FDA approved doxorubicin hydrochloride liposome injection (Sun Pharma Global FZE), a generic version of DOXIL Injection (doxorubicin hydrochloride liposome; Janssen Products, L.P.) for the treatment of ovarian cancer in patients whose disease has progressed or recurred after platinum-based chemotherapy and for AIDS-related Kaposi's sarcoma after failure of prior systemic chemotherapy or intolerance to such therapy. [More Information](#). February 4, 2013
- FDA approved bevacizumab (Avastin, Genentech U.S., Inc.) for use in combination with fluoropyrimidine-irinotecan or fluoropyrimidine-oxaliplatin based chemotherapy for the treatment of patients with metastatic colorectal cancer (mCRC) whose disease has progressed on a first-line bevacizumab-containing regimen. [More Information](#). January 23, 2013

## Search terms for literature search for accelerated approvals

### 1. Melanoma

Surrogate: ORR

Pubmed

(melanoma[tiab]) AND (objective response[tiab] OR response rate[tiab] OR overall survival[tiab] OR progression free[tiab] OR disease free[tiab] OR endpoint\*[tiab] OR surroga\*[tiab]) AND (review[tiab] OR search[tiab] OR meta-analys\*[tiab] OR systematic[tiab] OR validation[tiab] OR correlation[tiab] OR association[tiab] OR relationship[tiab] OR pooled[tiab]) AND (trial[tiab] OR studies[tiab])

Google scholar

allintitle: melanoma (endpoint OR endpoints OR surrogate OR surrogacy OR "overall survival" OR "progression-free" OR "disease-free" OR "time to progression" OR "response rate" OR "meta-analysis")

### 2. Follicular or SLL

Surrogate: ORR

Pubmed

(follicular[tiab] OR small lymphocytic[tiab]) AND (objective response[tiab] OR response rate[tiab] OR overall survival[tiab] OR progression free[tiab] OR disease free[tiab] OR endpoint\*[tiab] OR surroga\*[tiab]) AND (review[tiab] OR search[tiab] OR meta-analys\*[tiab] OR systematic[tiab] OR validation[tiab] OR correlation[tiab] OR association[tiab] OR relationship[tiab] OR pooled[tiab]) AND (trial[tiab] OR studies[tiab])

Google scholar

allintitle: Follicular (endpoint OR endpoints OR surrogate OR surrogacy OR "overall survival" OR "progression-free" OR "disease-free" OR "time to progression" OR "response rate" OR "meta-analysis")

allintitle: "Small lymphocytic" (endpoint OR endpoints OR surrogate OR surrogacy OR "overall survival" OR "progression-free" OR "disease-free" OR "time to progression" OR "response rate" OR "meta-analysis")

### 3. PTCL

Surrogate: ORR

Pubmed

(T cell lymphoma[tiab]) AND (objective response[tiab] OR response rate[tiab] OR overall survival[tiab] OR progression free[tiab] OR disease free[tiab] OR endpoint\*[tiab] OR surroga\*[tiab]) AND (review[tiab] OR search[tiab] OR meta-analys\*[tiab] OR systematic[tiab] OR validation[tiab] OR correlation[tiab] OR association[tiab] OR relationship[tiab] OR pooled[tiab]) AND (trial[tiab] OR studies[tiab])

Google scholar

allintitle: "T cell lymphoma" (endpoint OR endpoints OR surrogate OR surrogacy OR "overall survival" OR "progression-free" OR "disease-free" OR "time to progression" OR "response rate" OR "meta-analysis")

### 4. NSCLC

Surrogate: ORR

Pubmed

(non small cell lung[tiab])AND (objective response[tiab] OR response rate[tiab] OR overall survival[tiab] OR progression free[tiab] OR disease free[tiab] OR endpoint\*[tiab] OR surroga\*[tiab]) AND (review[tiab] OR search[tiab] OR meta-analys\*[tiab] OR systematic[tiab] OR validation[tiab] OR correlation[tiab] OR association[tiab] OR relationship[tiab] OR pooled[tiab]) AND (trial[tiab] OR studies[tiab])

Google scholar

allintitle: non small cell (endpoint OR endpoints OR surrogate OR surrogacy OR "overall survival" OR "progression-free" OR "disease-free" OR "time to progression" OR "response rate" OR "meta-analysis")

## 5. CLL

Surrogate: ORR

Pubmed

(CLL[tiab] or chronic lymphocytic leukemia[tiab])AND (objective response[tiab] OR response rate[tiab] OR overall survival[tiab] OR progression free[tiab] OR disease free[tiab] OR endpoint\*[tiab] OR surroga\*[tiab]) AND (review[tiab] OR search[tiab] OR meta-analys\*[tiab] OR systematic[tiab] OR validation[tiab] OR correlation[tiab] OR association[tiab] OR relationship[tiab] OR pooled[tiab]) AND (trial[tiab] OR studies[tiab])

Google scholar

allintitle: chronic lymphocytic (endpoint OR endpoints OR surrogate OR surrogacy OR "overall survival" OR "progression-free" OR "disease-free" OR "time to progression" OR "response rate" OR "meta-analysis")

## 6. Mantle cell lymphoma

Surrogate: ORR

Pubmed

(Mantle cell[tiab])AND (objective response[tiab] OR response rate[tiab] OR overall survival[tiab] OR progression free[tiab] OR disease free[tiab] OR endpoint\*[tiab] OR surroga\*[tiab]) AND (review[tiab] OR search[tiab] OR meta-analys\*[tiab] OR systematic[tiab] OR validation[tiab] OR correlation[tiab] OR association[tiab] OR relationship[tiab] OR pooled[tiab]) AND (trial[tiab] OR studies[tiab])

Google scholar

allintitle: mantle (endpoint OR endpoints OR surrogate OR surrogacy OR "overall survival" OR "progression-free" OR "disease-free" OR "time to progression" OR "response rate" OR "meta-analysis")

## 7. Breast cancer

Surrogate: pCR, PFS

Pubmed

(Breast cancer[tiab]) AND (objective response[tiab] OR response rate[tiab] OR pathologic complete response[tiab] OR overall survival[tiab] OR progression free[tiab] OR disease free[tiab] OR endpoint\*[tiab] OR surroga\*[tiab]) AND (review[tiab] OR search[tiab] OR meta-analys\*[tiab] OR systematic[tiab] OR validation[tiab] OR correlation[tiab] OR association[tiab] OR relationship[tiab] OR pooled[tiab]) AND (trial[tiab] OR studies[tiab])

Google scholar



allintitle: Breast cancer (endpoint OR endpoints OR surrogate OR surrogacy OR "overall survival" OR "progression-free" OR "disease-free" OR "time to progression" OR "response rate" OR "pathologic complete" OR "meta-analysis")

## 8. Multiple myeloma

Surrogate: ORR

### Pubmed

(Myeloma[tiab]) AND (objective response[tiab] OR response rate[tiab] OR overall survival[tiab] OR progression free[tiab] OR disease free[tiab] OR endpoint\*[tiab] OR surroga\*[tiab]) AND (review[tiab] OR search[tiab] OR meta-analys\*[tiab] OR systematic[tiab] OR validation[tiab] OR correlation[tiab] OR association[tiab] OR relationship[tiab] OR pooled[tiab]) AND (trial[tiab] OR studies[tiab])

### Google scholar

allintitle: myeloma (endpoint OR endpoints OR surrogate OR surrogacy OR "overall survival" OR "progression-free" OR "disease-free" OR "time to progression" OR "response rate" OR "meta-analysis")

## 9. CML

Surrogate: Major molecular response (MMR), Major Cytogenetic Response (MCyR) and Major Hematologic Response (MaHR), Confirmed complete cytogenetic response (CCyR)

### Pubmed

(CML[tiab] OR chronic myeloid leukemia[tiab]) AND (objective response[tiab] OR response rate[tiab] OR cytogenetic response[tiab] OR molecular response[tiab] OR hematologic response[tiab] OR overall survival[tiab] OR progression free[tiab] OR disease free[tiab] OR endpoint\*[tiab] OR surroga\*[tiab]) AND (review[tiab] OR search[tiab] OR meta-analys\*[tiab] OR systematic[tiab] OR validation[tiab] OR correlation[tiab] OR association[tiab] OR relationship[tiab] OR pooled[tiab]) AND (trial[tiab] OR studies[tiab])

### Google scholar

allintitle: CML (endpoint OR endpoints OR surrogate OR surrogacy OR "overall survival" OR "progression-free" OR "disease-free" OR "response rate" OR "molecular response" OR "cytogenetic response" OR "hematologic response" OR "meta-analysis")

## 10. Tuberous sclerosis with subependymal giant cell astrocytoma

Surrogate: ORR

### Pubmed

(astrocytoma [tiab]) AND (objective response[tiab] OR response rate[tiab] OR overall survival[tiab] OR progression free[tiab] OR disease free[tiab] OR endpoint\*[tiab] OR surroga\*[tiab]) AND (review[tiab] OR search[tiab] OR meta-analys\*[tiab] OR systematic[tiab] OR validation[tiab] OR correlation[tiab] OR association[tiab] OR relationship[tiab] OR pooled[tiab]) AND (trial[tiab] OR studies[tiab])

### Google scholar

allintitle: astrocytoma (endpoint OR endpoints OR surrogate OR surrogacy OR "overall survival" OR "progression-free" OR "disease-free" OR "time to progression" OR "SEGA" OR "response rate" OR "meta-analysis")

## 11. Ph- ALL

Surrogate: CR, CRi

Pubmed

(ALL[tiab] OR acute lymphoblastic leukemia[tiab]) AND (objective response[tiab] OR response rate[tiab] OR cytogenetic response[tiab] OR molecular response[tiab] OR hematologic response[tiab] OR complete remission[tiab] OR overall survival[tiab] OR progression free[tiab] OR disease free[tiab] OR endpoint\*[tiab] OR surroga\*[tiab]) AND (review[tiab] OR search[tiab] OR meta-analys\*[tiab] OR systematic[tiab] OR validation[tiab] OR correlation[tiab] OR association[tiab] OR relationship[tiab] OR pooled[tiab]) AND (trial[tiab] OR studies[tiab])

Google scholar

allintitle: lymphoblastic leukemia (endpoint OR endpoints OR surrogate OR surrogacy OR "overall survival" OR "progression-free" OR "disease-free" OR "time to progression" OR "complete remission" OR "response rate" OR "meta-analysis")

12. Tuberos sclerosis with renal angiomyolipoma

Surrogate: ORR

Pubmed

(angiomyolipoma [tiab]) AND (objective response[tiab] OR response rate[tiab] OR overall survival[tiab] OR progression free[tiab] OR disease free[tiab] OR endpoint\*[tiab] OR surroga\*[tiab]) AND (review[tiab] OR search[tiab] OR meta-analys\*[tiab] OR systematic[tiab] OR validation[tiab] OR correlation[tiab] OR association[tiab] OR relationship[tiab] OR pooled[tiab]) AND (trial[tiab] OR studies[tiab])

Google scholar

allintitle: angiomyolipoma (endpoint OR endpoints OR surrogate OR surrogacy OR "overall survival" OR "progression-free" OR "disease-free" OR "time to progression" OR "response rate" OR "meta-analysis")

13. Hodgkin's lymphoma and anaplastic large B cell lymphoma

Surrogate: ORR

Pubmed

(Hodgkin[tiab] OR Hodgkin's[tiab] OR anaplastic large[tiab])AND (objective response[tiab] OR response rate[tiab] OR overall survival[tiab] OR progression free[tiab] OR disease free[tiab] OR endpoint\*[tiab] OR surroga\*[tiab]) AND (review[tiab] OR search[tiab] OR meta-analys\*[tiab] OR systematic[tiab] OR validation[tiab] OR correlation[tiab] OR association[tiab] OR relationship[tiab] OR pooled[tiab]) AND (trial[tiab] OR studies[tiab])

Google scholar

allintitle: Hodgkin (endpoint OR endpoints OR surrogate OR surrogacy OR "overall survival" OR "progression-free" OR "disease-free" OR "time to progression" OR "response rate" OR "meta-analysis")

allintitle: Hodgkin's (endpoint OR endpoints OR surrogate OR surrogacy OR "overall survival" OR "progression-free" OR "disease-free" OR "time to progression" OR "response rate" OR "meta-analysis")

allintitle: Anaplastic (endpoint OR endpoints OR surrogate OR surrogacy OR "overall survival" OR "progression-free" OR "disease-free" OR "time to progression" OR "response rate" OR "meta-analysis")

14. Glioblastoma

Surrogate: ORR

## Pubmed

(Glioblastoma[tiab])AND (objective response[tiab] OR response rate[tiab] OR overall survival[tiab] OR progression free[tiab] OR disease free[tiab] OR endpoint\*[tiab] OR surroga\*[tiab]) AND (review[tiab] OR search[tiab] OR meta-analys\*[tiab] OR systematic[tiab] OR validation[tiab] OR correlation[tiab] OR association[tiab] OR relationship[tiab] OR pooled[tiab]) AND (trial[tiab] OR studies[tiab])

## Google scholar

allintitle: Glioblastoma (endpoint OR endpoints OR surrogate OR surrogacy OR "overall survival" OR "progression-free" OR "disease-free" OR "time to progression" OR "response rate" OR "meta-analysis")



## Search terms for literature search for regular approvals

### 1. Renal cell carcinoma

Surrogate: PFS

Pubmed

(Renal cell[tiab]) AND (objective response[tiab] OR response rate[tiab] OR overall survival[tiab] OR progression free[tiab] OR disease free[tiab] OR endpoint\*[tiab] OR surroga\*[tiab]) AND (review[tiab] OR search[tiab] OR meta-analys\*[tiab] OR systematic[tiab] OR validation[tiab] OR correlation[tiab] OR association[tiab] OR relationship[tiab] OR pooled[tiab]) AND (trial[tiab] OR studies[tiab])

Google scholar

allintitle: "Renal cell" (endpoint OR endpoints OR surrogate OR surrogacy OR "overall survival" OR "progression-free" OR "disease-free" OR "time to progression" OR "response rate" OR "meta-analysis")

### 2. CTCL

Surrogate: ORR

Pubmed

(T cell lymphoma[tiab]) AND (objective response[tiab] OR response rate[tiab] OR overall survival[tiab] OR progression free[tiab] OR disease free[tiab] OR endpoint\*[tiab] OR surroga\*[tiab]) AND (review[tiab] OR search[tiab] OR meta-analys\*[tiab] OR systematic[tiab] OR validation[tiab] OR correlation[tiab] OR association[tiab] OR relationship[tiab] OR pooled[tiab]) AND (trial[tiab] OR studies[tiab])

Google scholar

allintitle: "T cell lymphoma" (endpoint OR endpoints OR surrogate OR surrogacy OR "overall survival" OR "progression-free" OR "disease-free" OR "time to progression" OR "response rate" OR "meta-analysis")

### 3. Medullary thyroid cancer

Surrogate: PFS

Pubmed

(Thyroid cancer[tiab]) AND (objective response[tiab] OR response rate[tiab] OR overall survival[tiab] OR progression free[tiab] OR disease free[tiab] OR endpoint\*[tiab] OR surroga\*[tiab]) AND (review[tiab] OR search[tiab] OR meta-analys\*[tiab] OR systematic[tiab] OR validation[tiab] OR correlation[tiab] OR association[tiab] OR relationship[tiab] OR pooled[tiab]) AND (trial[tiab] OR studies[tiab])

Google scholar

allintitle: "Thyroid cancer" (endpoint OR endpoints OR surrogate OR surrogacy OR "overall survival" OR "progression-free" OR "disease-free" OR "time to progression" OR "response rate" OR "meta-analysis")

### 4. GEP-NET

Surrogate: PFS

Pubmed

(Neuroendocrine[tiab]) AND (objective response[tiab] OR response rate[tiab] OR overall survival[tiab] OR progression free[tiab] OR disease free[tiab] OR endpoint\*[tiab] OR surroga\*[tiab]) AND (review[tiab] OR search[tiab] OR meta-analys\*[tiab] OR systematic[tiab] OR validation[tiab] OR correlation[tiab] OR association[tiab] OR relationship[tiab] OR pooled[tiab]) AND (trial[tiab] OR studies[tiab])

Google scholar

allintitle: "Neuroendocrine" (endpoint OR endpoints OR surrogate OR surrogacy OR "overall survival" OR "progression-free" OR "disease-free" OR "time to progression" OR "response rate" OR "meta-analysis")

5. Basal cell carcinoma  
Surrogate: ORR

Pubmed

(Basal cell[tiab]) AND (objective response[tiab] OR response rate[tiab] OR overall survival[tiab] OR progression free[tiab] OR disease free[tiab] OR endpoint\*[tiab] OR surroga\*[tiab]) AND (review[tiab] OR search[tiab] OR meta-analys\*[tiab] OR systematic[tiab] OR validation[tiab] OR correlation[tiab] OR association[tiab] OR relationship[tiab] OR pooled[tiab]) AND (trial[tiab] OR stud\*[tiab])

Google scholar

allintitle: "Basal cell" (endpoint OR endpoints OR surrogate OR surrogacy OR "overall survival" OR "progression-free" OR "disease-free" OR "time to progression" OR "response rate" OR "meta-analysis")

6. Soft tissue sarcoma  
Surrogate: PFS

Pubmed

(sarcoma[tiab]) AND (objective response[tiab] OR response rate[tiab] OR overall survival[tiab] OR progression free[tiab] OR disease free[tiab] OR endpoint\*[tiab] OR surroga\*[tiab]) AND (review[tiab] OR search[tiab] OR meta-analys\*[tiab] OR systematic[tiab] OR validation[tiab] OR correlation[tiab] OR association[tiab] OR relationship[tiab] OR pooled[tiab]) AND (trial[tiab] OR studies[tiab])

Google scholar

allintitle: "sarcoma" (endpoint OR endpoints OR surrogate OR surrogacy OR "overall survival" OR "progression-free" OR "disease-free" OR "time to progression" OR "response rate" OR "meta-analysis")

7. Ovarian cancer  
Surrogate: ORR

Pubmed

(Ovarian cancer[tiab]) AND (objective response[tiab] OR response rate[tiab] OR overall survival[tiab] OR progression free[tiab] OR disease free[tiab] OR endpoint\*[tiab] OR surroga\*[tiab]) AND (review[tiab] OR search[tiab] OR meta-analys\*[tiab] OR systematic[tiab] OR validation[tiab] OR correlation[tiab] OR association[tiab] OR relationship[tiab] OR pooled[tiab]) AND (trial[tiab] OR studies[tiab])

Google scholar

allintitle: "Ovarian" (endpoint OR endpoints OR surrogate OR surrogacy OR "overall survival" OR "progression-free" OR "disease-free" OR "time to progression" OR "response rate" OR "meta-analysis")

8. Ovarian/fallopian/primary peritoneal  
Surrogate: PFS

(Fallopian[tiab]) AND (objective response[tiab] OR response rate[tiab] OR overall survival[tiab] OR progression free[tiab] OR disease free[tiab] OR endpoint\*[tiab] OR surroga\*[tiab]) AND (review[tiab] OR search[tiab] OR meta-analys\*[tiab] OR systematic[tiab] OR validation[tiab] OR correlation[tiab] OR association[tiab] OR relationship[tiab] OR pooled[tiab]) AND (trial[tiab] OR studies[tiab])

(Peritoneal[tiab]) AND (objective response[tiab] OR response rate[tiab] OR overall survival[tiab] OR progression free[tiab] OR disease free[tiab] OR endpoint\*[tiab] OR surroga\*[tiab]) AND (review[tiab] OR search[tiab] OR meta-analys\*[tiab] OR systematic[tiab] OR validation[tiab] OR correlation[tiab] OR association[tiab] OR relationship[tiab] OR pooled[tiab]) AND (trial[tiab] OR studies[tiab])

allintitle: "Fallopian" (endpoint OR endpoints OR surrogate OR surrogacy OR "overall survival" OR "progression-free" OR "disease-free" OR "time to progression" OR "response rate" OR "meta-analysis")

allintitle: "Peritoneal" (endpoint OR endpoints OR surrogate OR surrogacy OR "overall survival" OR "progression-free" OR "disease-free" OR "time to progression" OR "response rate" OR "meta-analysis")

## 9. Giant cell

Surrogate: ORR and duration of response

### Pubmed

(Giant cell[tiab]) AND (objective response[tiab] OR response rate[tiab] OR overall survival[tiab] OR progression free[tiab] OR disease free[tiab] OR endpoint\*[tiab] OR surroga\*[tiab]) AND (review[tiab] OR search[tiab] OR meta-analys\*[tiab] OR systematic[tiab] OR validation[tiab] OR correlation[tiab] OR association[tiab] OR relationship[tiab] OR pooled[tiab]) AND (trial[tiab] OR studies[tiab])

### Google scholar

allintitle: "Giant cell" (endpoint OR endpoints OR surrogate OR surrogacy OR "overall survival" OR "progression-free" OR "disease-free" OR "time to progression" OR "response rate" OR "meta-analysis")

## 10. Multicentric Castleman's disease

Surrogate: ORR and duration of response

### Pubmed

(Castleman's[tiab] OR Castleman[tiab]) AND (response[tiab])

### Google scholar

allintitle: "Castleman's" (endpoint OR endpoints OR surrogate OR surrogacy OR "overall survival" OR "progression-free" OR "disease-free" OR "time to progression" OR "response" OR "meta-analysis")

allintitle: "Castleman" (endpoint OR endpoints OR surrogate OR surrogacy OR "overall survival" OR "progression-free" OR "disease-free" OR "time to progression" OR "response" OR "meta-analysis")

## Search terms for subsequent publication

Google scholar was searched using 'drug name, 'cancer type', and 'survival'. Search was limited to articles published after January 1, 2009.

## Search terms for accelerated approvals

1. Belinostat peripheral lymphoma
2. Bevacizumab glioblastoma
3. Blinatumomab acute lymphocytic leukemia
4. Brentuximab Hodgkin lymphoma; Brentuximab anaplastic lymphoma
5. Carfilzomib multiple myeloma
6. Ceritinib lung cancer survival
7. Crizotinib lung cancer survival
8. Dasatinib chronic myeloid leukemia survival
9. Everolimus giant cell astrocytoma survival
10. Everolimus angiomyolipoma
11. Ibrutinib chronic lymphocytic leukemia survival
12. Ibrutinib mantle cell lymphoma survival
13. Idelalisib follicular lymphoma survival; Idelalisib small follicular lymphoma survival
14. Lapatinib letrozole breast cancer survival
15. Liposomal vincristine acute lymphocytic leukemia
16. Nilotinib chronic myeloid leukemia survival
17. Nivolumab melanoma survival
18. Ofatumumab chronic lymphocytic leukemia survival
19. Omecetaxine chronic myeloid leukemia survival
20. Pembrolizumab melanoma survival
21. Pertuzumab breast cancer survival
22. Pomalidomide multiple myeloma survival
23. Ponatinib chronic myeloid leukemia survival
24. Pralatrexate peripheral lymphoma
25. Trametinib and dabrafenib melanoma survival

## Search terms for regular approvals

1. Bosutinib chronic myeloid leukemia survival
2. Nab-paclitaxel lung cancer survival
3. Olaparib ovarian cancer survival
4. Romidepsin cutaneous lymphoma
5. Vismodegib basal cell carcinoma survival
6. Denosumab giant cell tumor
7. Lenalidomide mantle cell lymphoma survival
8. Afatinib lung cancer survival
9. Axitinib renal cell carcinoma survival
10. Bevacizumab ovarian cancer survival; Bevacizumab fallopian; Bevacizumab peritoneal
11. Bevacizumab renal cell carcinoma survival
12. Cabozantinib thyroid cancer survival
13. Crizotinib lung cancer survival
14. Dabrafenib melanoma survival
15. Erlotinib lung cancer survival
16. Everolimus neuroendocrine tumor survival
17. Everolimus renal cell carcinoma survival
18. Everolimus breast cancer survival
19. Lanreotide neuroendocrine tumor survival
20. Obinutuzumab chronic lymphocytic leukemia survival
21. Ofatumumab chronic lymphocytic leukemia survival
22. Pazopanib sarcoma survival
23. Pazopanib renal cell carcinoma survival
24. Interferon renal cell carcinoma survival
25. Pertuzumab breast cancer survival
26. Rituximab follicular lymphoma survival
27. Rituximab chronic myeloid leukemia survival
28. Sorafenib thyroid cancer survival
29. Sunitinib neuroendocrine tumor survival
30. Vandetanib thyroid cancer survival



## Consort diagrams

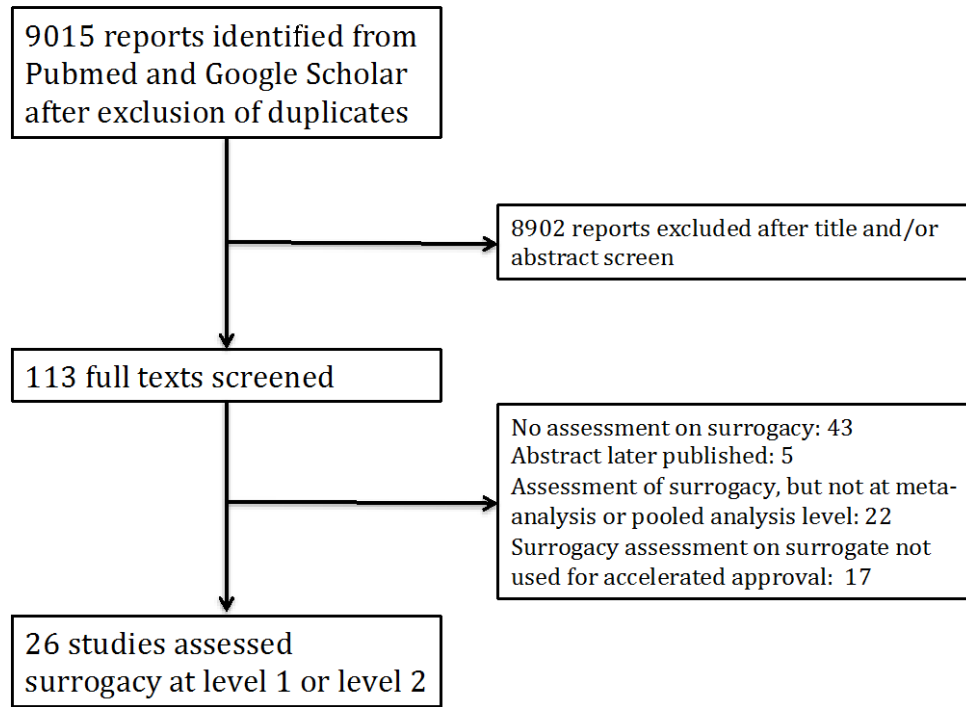

Accelerated approval

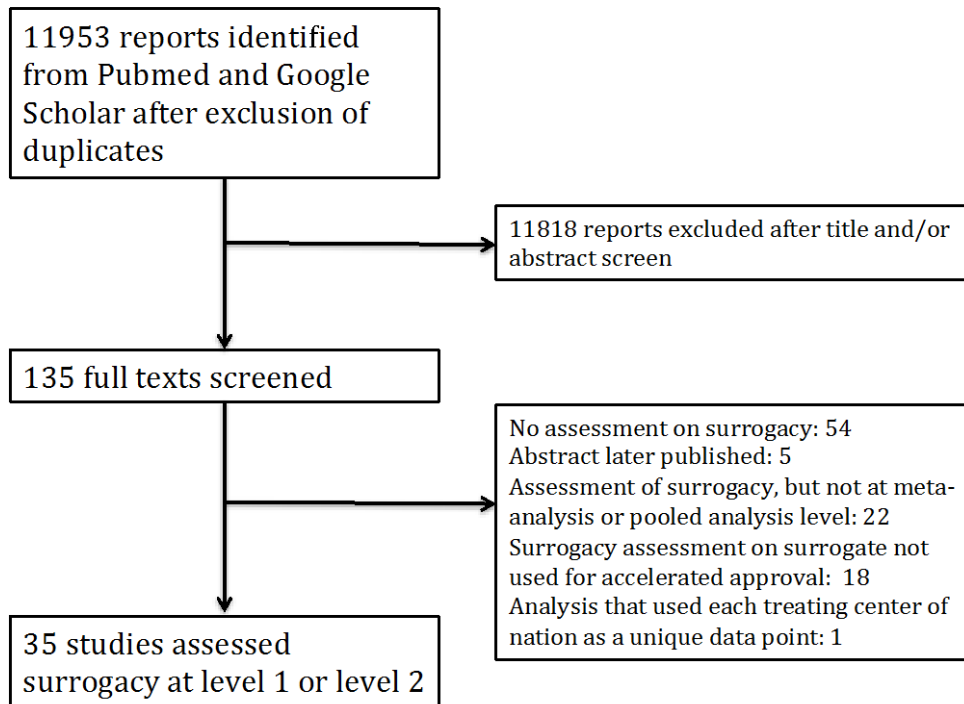

Accelerated and Regular approval

## Flow Diagram of Overall Study Strategy

Identify all cancer drugs approved by the US FDA on the basis of a surrogate (e.g. Progression Free survival) from 2008-2013

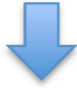

Identify which approvals are Accelerated, where a surrogate only has to be 'reasonably likely to predict' and which are Traditional where a surrogate has to be 'established'

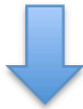

For each approval, search for whether a formal analysis has evaluated the strength of the surrogate-survival correlation
